# Supplementary material for: Cosmogenic 3 He exposure dating in mafic rocks by “Virtual mineral separation” of pyroxene
Source: Copernicus journal article supplement (doi:10.5194/gchron-8-19-2026), 2026-01-16
Supplement: Supplementary file [file gchron-8-19-2026-supplement-title-page.pdf › gchron-8-19-2026-supplement-title-page.pdf]

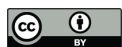

## *Supplement of*

# **Cosmogenic $^3\text{He}$ exposure dating in mafic rocks by “Virtual mineral separation” of pyroxene**

**Marie Bergelin et al.**

*Correspondence to:* Marie Bergelin (mbergelin@bgc.org)

- gchron-8-19-2026-supplement-title-page.pdf
- Supplementary material
  - Table S1.xlsx
  - Table S2.xlsx
  - Table S3.xlsx

The copyright of individual parts of the supplement might differ from the article licence.
